# Supplementary material
Source: publisher figshare collection journal article supplement (https://gsapubs.figshare.com/articles/dataset/_/12536261)
Supplement: Supplementary file 1 [file 1]

Angiboust, S., Cambeses, A., Hyppolito, T., Glodny, J., Monié, P., Calderón, M., and Juliani, C., 2018, A 100 Ma-long window onto mass flow processes in the Patagonian Mesozoic subduction zone (Diego de Almagro Island, Chile): GSA Bulletin, <https://doi.org/10.1130/B31891.1>.

## Data Repository

**Electronic Appendix DR1.** petrology and P-T estimates for amphibolitization conditions in the SASZ

**Electronic Appendix DR2.** Location of  $^{39}\text{Ar}$ - $^{40}\text{Ar}$  ablation sites for the five samples studied.

**Electronic Appendix DR3.** Cawood cumulative zircon ages plots

**Table DR1.** Full Rb-Sr dataset

**Table DR2.** Full  $^{39}\text{Ar}$ - $^{40}\text{Ar}$  dataset

**Table DR3.** Full U-Pb dataset; U-Th-Pb SHRIMP data for for samples: #48c; #47a; #39; and

#43.  $d(\%) = 100 \times (1 - 206/238 \text{ age} / 207/235 \text{ age})$ ;  $f^{206}\% = (\text{common } ^{206}\text{Pb} / \text{total } ^{206}\text{Pb}) \times 100$ .

All uncertainties are at 95%.

**Table DR4.** GPS coordinates of sampling localities

## Electronic Appendix 1: Petrology of the Seno Arcabuz Shear Zone (SASZ)

### Electron probe analyses

Electron probe micro-analyses have been characterized at the GFZ Potsdam with a JEOL-JXA 8230 probe under common analytical conditions (15 kV, 20 nA, wavelength-dispersive spectroscopy mode), using a 10  $\mu\text{m}$  beam. The standards used for the calibration are the following: orthoclase (Al, Si, K), fluorite (F), rutile (Ti),  $\text{Cr}_2\text{O}_3$  (Cr), wollastonite (Ca), tugtupite (Cl), albite (Na), MgO (Mg),  $\text{Fe}_2\text{O}_3$  (Fe) and rhodonite (Mn). Amphibole compositions were normalized following the scheme of Leake et al. (1997) with  $\text{Fe}^{3+}$  estimated using the average normalization-factor. Chlorite and white mica were normalized to 28 and 11 oxygens, respectively, assuming  $\text{Fe}_{\text{total}} = \text{Fe}^{2+}$ . Plagioclase and epidote were normalized to 8 and 12.5 oxygens, respectively, assuming  $\text{Fe}_{\text{total}}$  as  $\text{Fe}^{3+}$ . Mineral abbreviations used are after Whitney and Evans (2010).

### Petrography and mineral chemistry

Mafic rocks from the SASZ are generally formed by foliation-parallel hornblende crystals tightly interbedded with epidote or plagioclase richer layers (Fig.S1a). Quartz richer bands are also present. Minor amounts of biotite dispersed in the matrix and systematically parallel to the foliation are visible. Amphiboles sometimes exhibit tremolitic cores, hornblende mantles and thin tremolite overgrowths (**Figs.S1 and S2a,b,c**). Flattened plagioclase porphyroclasts are always present, exhibiting myrmekitic textures. Anorthite-richer cores ( $\text{An}_{25-30}$ ) are rimmed by an albite rich plagioclase ( $\text{An}_{2-5}$ ). In one sample a 5mm-thick leucocratic band parallelized to the main amphibolite foliation, comprising quartz and myrmekitic plagioclase recalls the texture of some trondhjemitic segregates observed in the adjacent Lazaro unit (Angiboust et al., 2017).

Metasediments are characterized by large amounts of quartz (>40 vol.%) and foliation parallel mica-rich layers wrapping plagioclase, garnet or staurolite porphyroclasts (**Fig.S1c,d**). Garnet exhibits Mn and Ca richer cores and shows an increase in Mg towards the rims and along garnet healed fractures (**Fig.S2d**). The plagioclase is myrmekitic, with anorthite rich cores ( $\text{An}_{24-30}$ ) and albite rich rims ( $\text{An}_{1-2}$ ). The relationships between biotite and muscovite suggest that larger amounts of biotite were present at peak conditions and a large part of them have been replaced by muscovite along shear bands during post-peak deformation (**Fig.S3a,b**). Very thin (10  $\mu\text{m}$ -sized) celadonite-rich (phengitic) rims with silica contents comprised between 3.3 and 3.4 pfu are very commonly observed around muscovite crystals aligned along the main foliation (**Fig.S1f**). Importantly, these rims form randomly

around muscovite crystals and do not show peculiar orientation (“static overgrowth”).

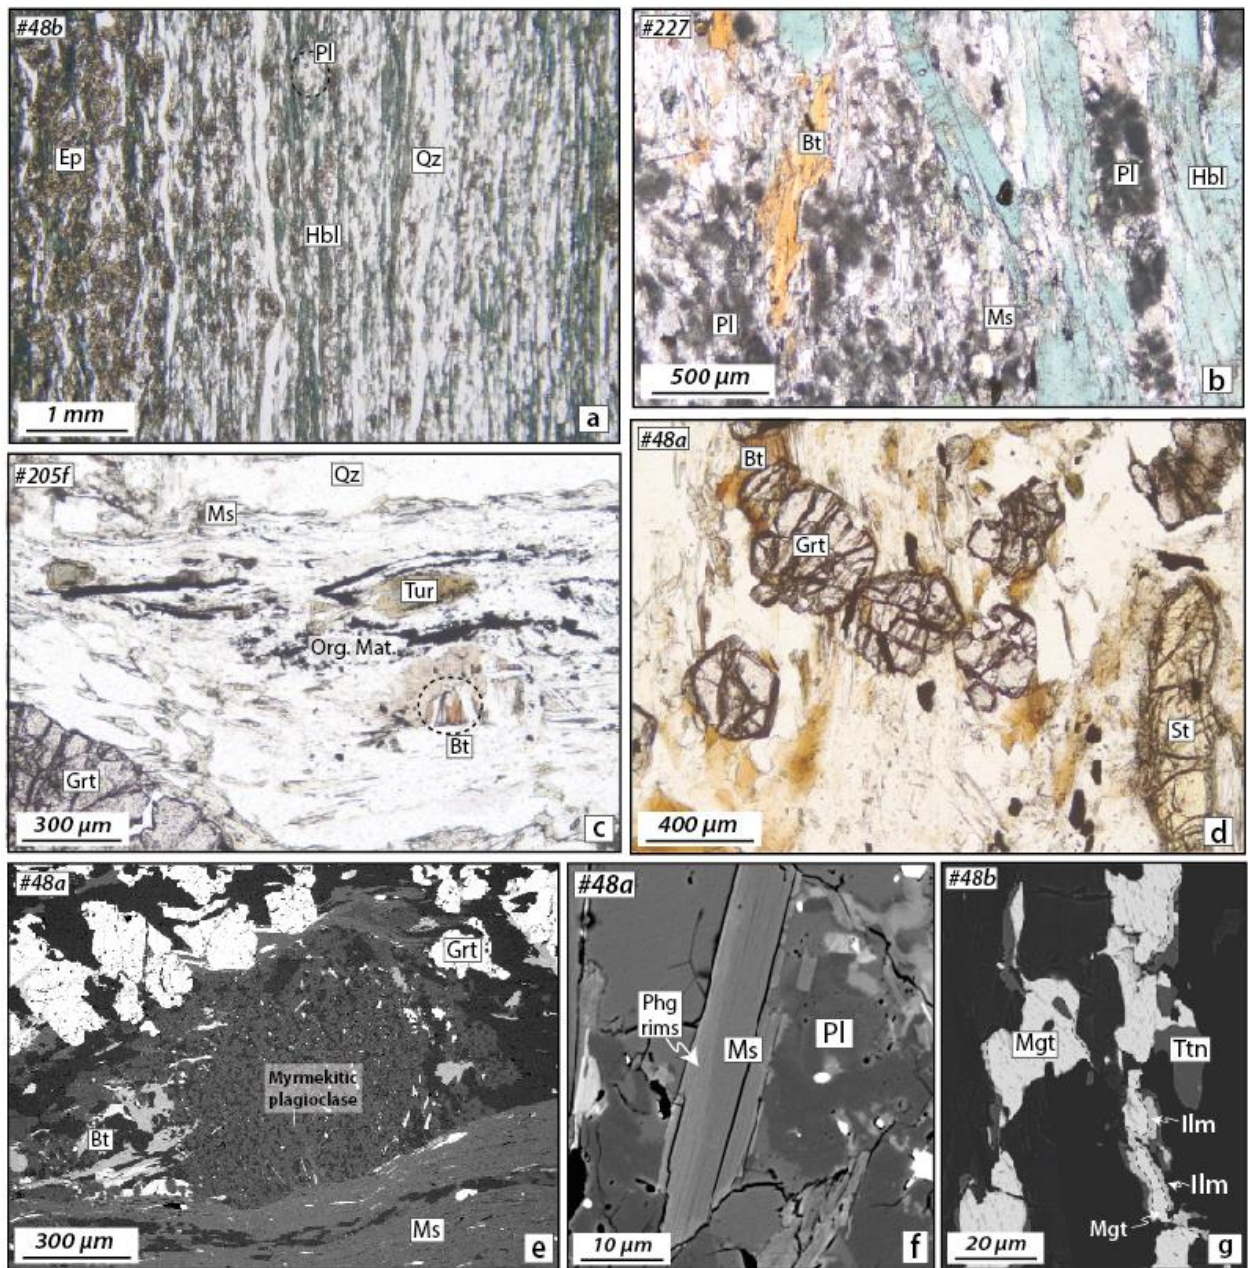

*Fig.S1.a : Representative optical microscope view (natural light) of a qtz-bearing tuff from the SASZ with alternance of Qtz-Ab rich layers and Ep-Hbl rich layers. Note the very fine grain size and the pervasive mineral orientation due to mylonitization. b. Amphibolite from the SASZ showing biotite, plagioclase and hornblende in textural equilibrium. c. Metasediment from the SASZ showing the relationship between biotite, muscovite, garnet, tourmaline (Tur) and the main foliation (natural light). Org.Mat.: organic matter. d. Microtextural relationship between garnet, biotite and staurolite in a metapelite from the SASZ. e. SEM back scattered image showing a myrmekitic plagioclase wrapped in the foliation of a garnet micaschist. Note the pressure shadows filled by biotite. f. SEM BSE microphotograph showing a muscovite grain rimmed by a phengite-rich composition. g. SEM BSE*



image showing magnetite grains replaced by ilmenite (amphibolitization) further replaced by titanite (greenschist facies).

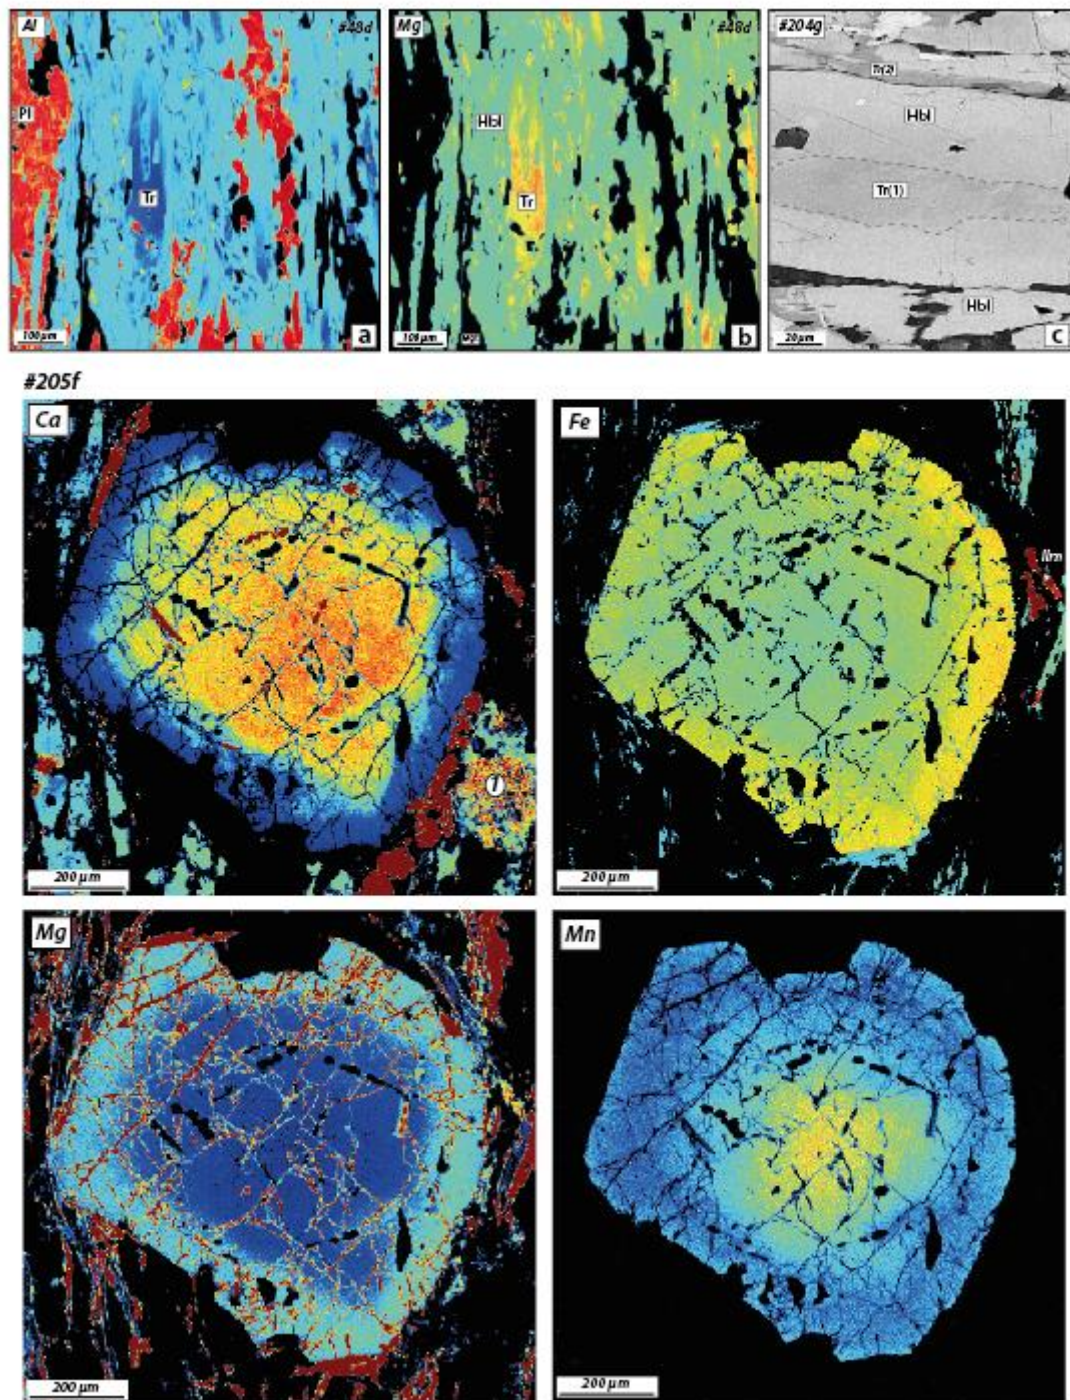

Fig.S2.a,b : X-ray map of an amphibole aggregate in a mafic tuff from the SASZ with tremolitic cores and hornblende-rich rims. c. SEM BSE image showing three generations of amphibole, with tremolitic cores and rims with a hornblende-rich mantle. d. X-ray map of a garnet from a micaschist from the SASZ showing Ca and Mn-rich cores and Fe-Mg richer rims.



*illustrates that higher pressure amphiboles are found in GA and BS units. c and d. Composition from white micas from SASZ and comparison with adjacent units. Note how similar the phengite overgrowths in SASZ are compared to Lazaro and GA units late phengite rims.*

## **Pseudosection modeling**

The P-T location of the peak metamorphic assemblage during the mylonitization stage along the SASZ has been investigated using the pseudosection modeling approach and the software package Perplex (v.6.7.4; Connolly, 2005). In order to obtain the most accurate bulk composition estimate of the mylonitic domain on which we decided to work, we preferred to use an average of five 2 mm<sup>2</sup> surface composition estimates performed at the scanning electron microprobe (SEM; see Angiboust & Agard, 2010 for details on the method). The sample #48a corresponds to a metapelite comprising garnet, staurolite, biotite, muscovite and chlorite (**Fig.S1d**). The thermodynamic modeling has been performed in the TiNCKFMASH system (manganese and ferric iron, not detected by the EDS detectors at the SEM, have been neglected for simplicity). The estimated bulk composition (in wt.%) used for this calculation is the following: SiO<sub>2</sub>(67.92) TiO<sub>2</sub>(0.70) Al<sub>2</sub>O<sub>3</sub>(16.10) FeO(5.04) MgO(1.74) CaO(1.28) Na<sub>2</sub>O(2.13) K<sub>2</sub>O(2.99). Pure water has been considered in excess for this run. Activity models used here are the following: garnet, staurolite and phengite (Holland & Powell, 1998), biotite (Tajcmanova et al., 2009), orthopyroxene (Powell and Holland, 1999), amphibole (Dale et al., 2005), chlorite (Holland et al., 1998), melt (White et al., 2001 and White et al., 2007), and feldspar (Fuhrman and Lindsley, 1988). The grid has been calculated between 550°C and 700°C and for a pressure range between 0.6 and 1.0 GPa.

The results of this modeling, shown in **figure S4**, enable the identification of a relatively narrow P-T field for which garnet, staurolite, plagioclase, biotite and muscovite are co-stable. This field plots in the pressure range 0.8-0.9 GPa and in the temperature range 600-640°C. Importantly, the presence of garnet in our rock for this composition constrains the minimum pressure and the absence of melt limits the temperature to c.660°C maximum. We used the garnet grossular content isopleths to check the agreement with natural data: measured garnet core grossular contents are between 0.08 and 0.11, which is agreement with modeled garnet composition in

figure S4 (c. 0.10 for the Grt-St field). Similarly, the measured pyrope content is of 0.12 mol.% Prp while the modeled content is 0.13. The Si content of measured muscovite crystal cores is between 3.02 and 3.15 in agreement with modeled Si contents of c.3.11 pfu for the best-fit peak metamorphic conditions. Note that the

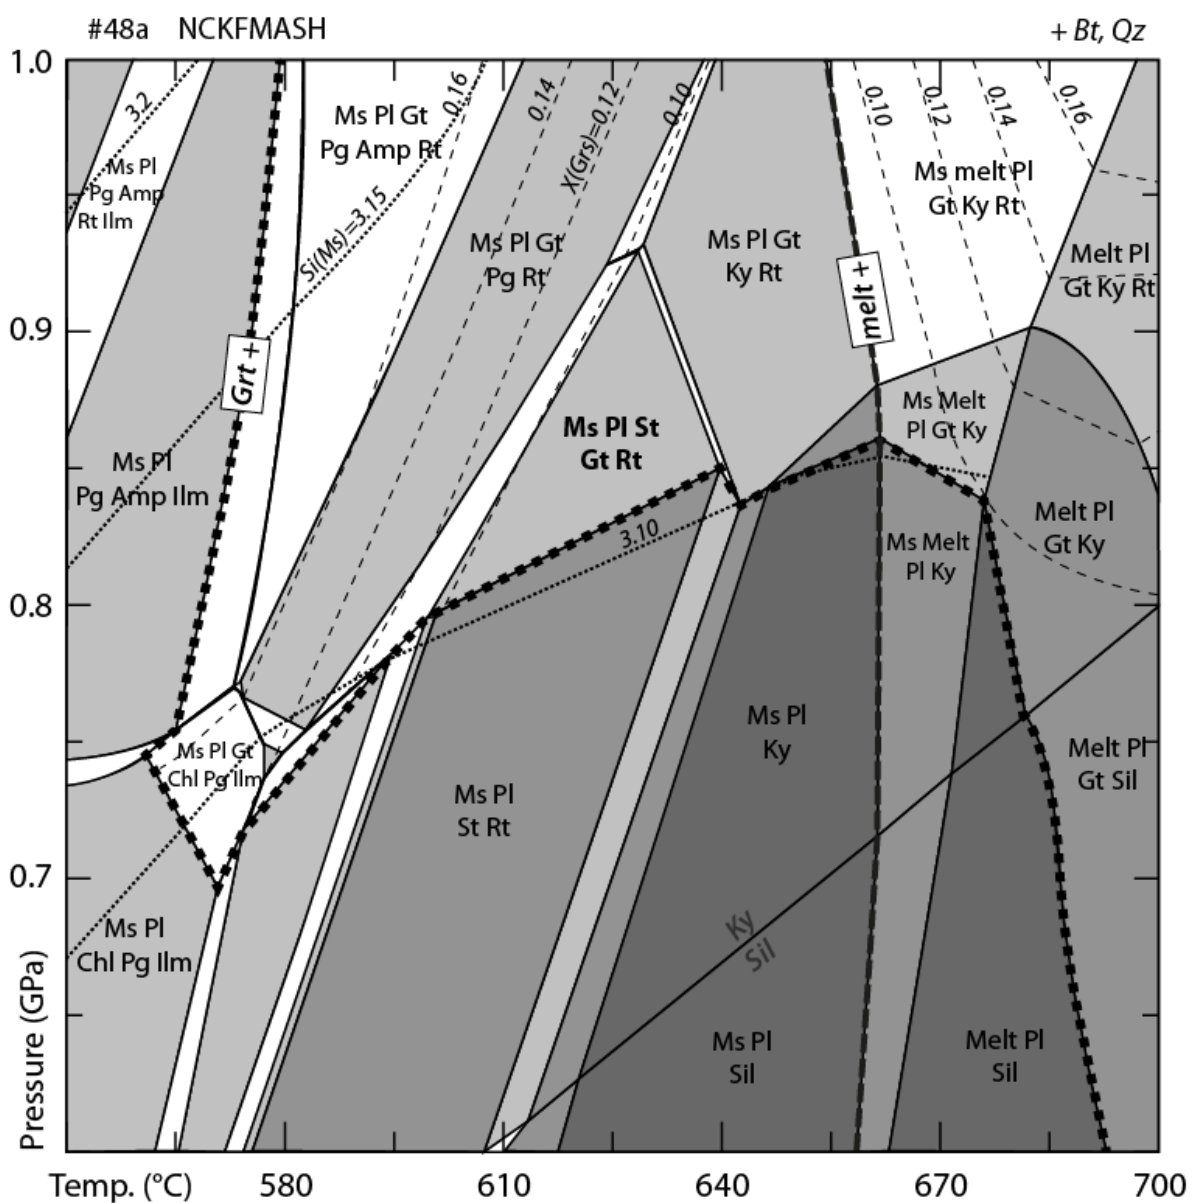

Fig.S4: *P-T pseudosection modeling result showing the topology for sample #48a. The best-fit conditions are marked in bold by the assemblage Ms-Pl-St-Gt-Rt-Bt-Qz.*

presence of static phengite overgrowths around muscovite with higher Si content (up to 3.32 pfu) implies a decrease in the P/T gradient after mylonitization. Under peak conditions ( $P=0.86$  GPa and  $T=620^{\circ}\text{C}$ ), the predicted anorthite content of plagioclase is 0.25 which overlaps with the range measured for plagioclase cores ( $An=0.24-0.3$ ).



Last, the mineral proportions predicted by the modeling at peak conditions are (in vol.%): Grt(2) St(3) Ms(12) Bt(15) Pl(25) Rt(0.2) Qz(43). These proportions are in good agreement with surface estimate proportions performed using optical microscopy (vol.%: Grt(2) St(1) Ms(20) Bt(6) Pl(20) Ilm(0.5) Qz(50)). The only discrepancy between the model and petrological observations concerns the nature of Ti-bearing phases at peak conditions. While the model predicts rutile as the stable phase, the presence of ilmenite inclusions in garnet rather suggests that ilmenite was stable under peak conditions. Given the low amount of TiO<sub>2</sub> in the system, we believe that this slight discrepancy does not significantly affect first-order phase relationships in the model.

## References cited

Angiboust, S., & Agard, P. (2010). Initial water budget: The key to detaching large volumes of eclogitized oceanic crust along the subduction channel?. *Lithos*, 120(3), 453-474.

Connolly, J. A. (2005). Computation of phase equilibria by linear programming: a tool for geodynamic modeling and its application to subduction zone decarbonation. *Earth and Planetary Science Letters*, 236(1), 524-541.

Dale, J., Powell, R., White, R. W., Elmer, F. L., & Holland, T. J. B. (2005). A thermodynamic model for Ca–Na clinoamphiboles in Na<sub>2</sub>O–CaO–FeO–MgO–Al<sub>2</sub>O<sub>3</sub>–SiO<sub>2</sub>–H<sub>2</sub>O–O for petrological calculations. *Journal of Metamorphic Geology*, 23(8), 771-791.

Fuhrman, M. L., & Lindsley, D. H. (1988). Ternary-feldspar modeling and thermometry. *American Mineralogist*, 73(3-4), 201-215.

Holland, T. J. B., & Powell, R. (1998). An internally consistent thermodynamic data set for phases of petrological interest. *Journal of metamorphic Geology*, 16(3), 309-343.

Holland, T., Baker, J., & Powell, R. (1998). Mixing properties and activity-composition relationships of chlorites in the system MgO–FeO–Al<sub>2</sub>O<sub>3</sub>–SiO<sub>2</sub>–H<sub>2</sub>O. *European Journal of Mineralogy*, 395-406.

Leake, B. E., Woolley, A. R., Arps, C. E., Birch, W. D., Gilbert, M. C., Grice, J. D., ... & Linthout, K. (1997). Report. Nomenclature of Amphiboles: Report of the Subcommittee on Amphiboles of the International Mineralogical Association Commission on New Minerals and Mineral Names. *Mineralogical magazine*, 61(2), 295-321.

Powell, R., & Holland, T. (1999). Relating formulations of the thermodynamics of mineral solid solutions: activity modeling of pyroxenes, amphiboles, and micas. *American Mineralogist*, 84(1-2), 1-14.

Tajčmanová, L., Connolly, J. A. D., & Cesare, B. (2009). A thermodynamic model for titanium and ferric iron solution in biotite. *Journal of Metamorphic Geology*, 27(2), 153-165.



White, R. W., Powell, R., & Holland, T. J. B. (2007). Progress relating to calculation of partial melting equilibria for metapelites. *Journal of Metamorphic Geology*, 25(5), 511-527.

Whitney, D. L., & Evans, B. W. (2010). Abbreviations for names of rock-forming minerals. *American mineralogist*, 95(1), 185.

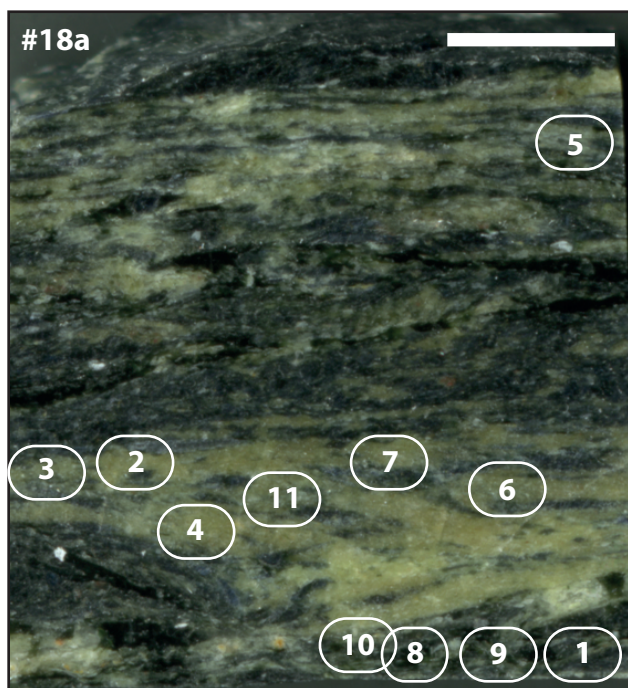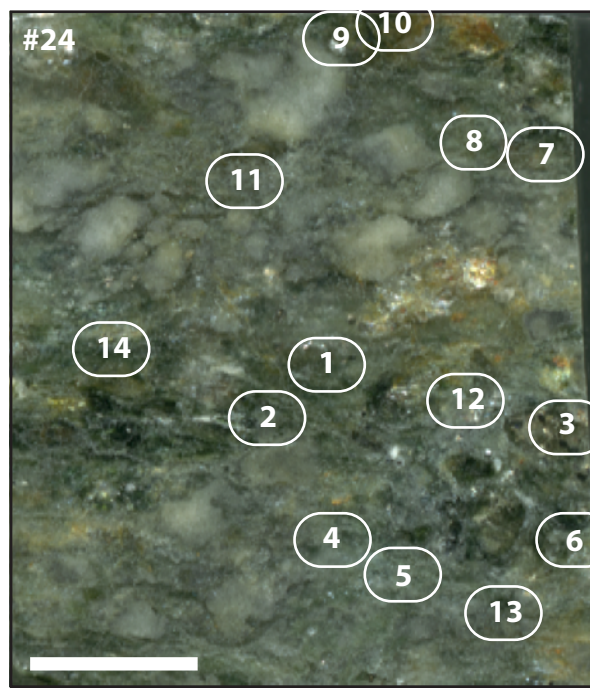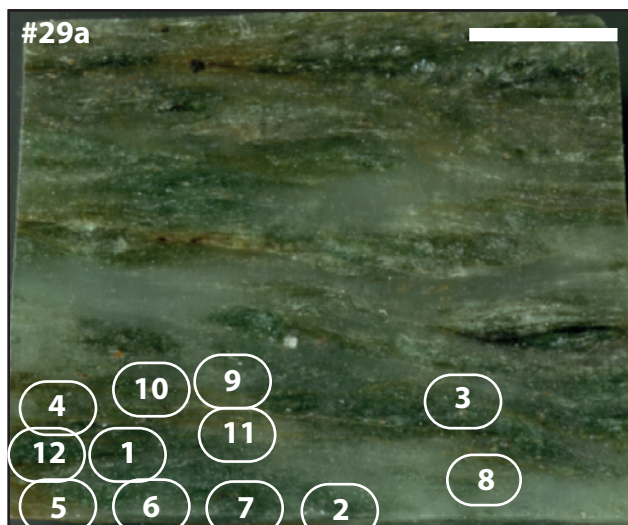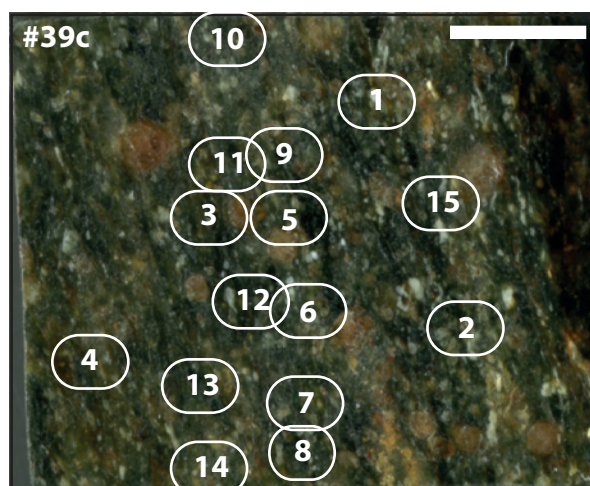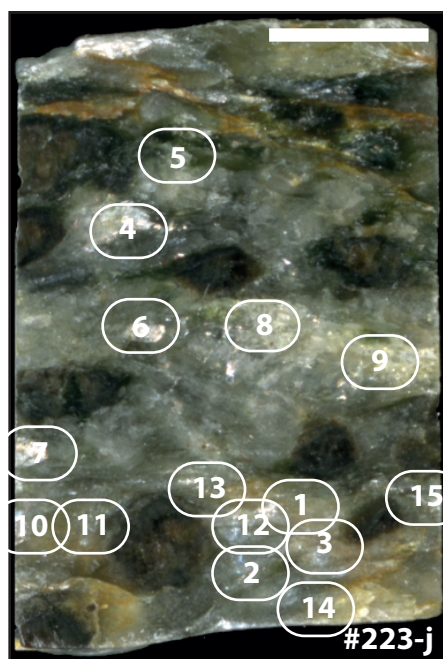

## Electronic appendix 2:

Spot location of *in situ* Ar-Ar analyses.

(white scale bar represents 2.5 mm)

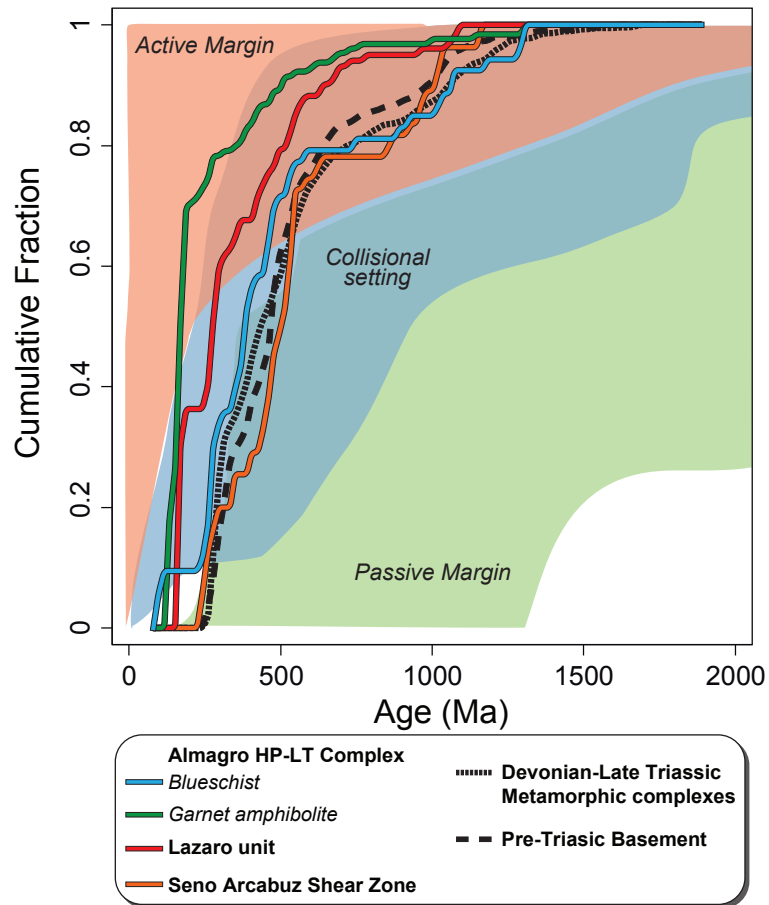

**Cawood cumulative probability plots**

TABLE DR1. Rb Sr 48b

| Sample no.<br>Analysis no.                                                   | Material                         | Rb (ppm) | Sr (ppm) | $^{87}\text{Rb}/^{86}\text{Sr}$ | $^{87}\text{Sr}/^{86}\text{Sr}$ | $^{87}\text{Sr}/^{86}\text{Sr} \pm 2s_m$ |
|------------------------------------------------------------------------------|----------------------------------|----------|----------|---------------------------------|---------------------------------|------------------------------------------|
| <b>#48b</b> ( $117.1 \pm 2.6$ Ma, MSWD = 219, $Sr_i = 0.70518 \pm 0.00063$ ) |                                  |          |          |                                 |                                 |                                          |
| PS2625                                                                       | biotite conc. >125 $\mu\text{m}$ | 155      | 14.9     | 30.3                            | 0.755032                        | 0.0046                                   |
| PS2626                                                                       | plagioclase                      | 1.45     | 6.07     | 0.69                            | 0.706589                        | 0.0056                                   |
| PS2722                                                                       | amphibole                        | 24.0     | 32.3     | 2.15                            | 0.708799                        | 0.0021                                   |
| PS2723                                                                       | epidote                          | 2.41     | 151      | 0.0463                          | 0.704810                        | 0.0029                                   |
| PS2724                                                                       | biotite 125-90 $\mu\text{m}$     | 199      | 9.14     | 63.5                            | 0.808800                        | 0.0022                                   |



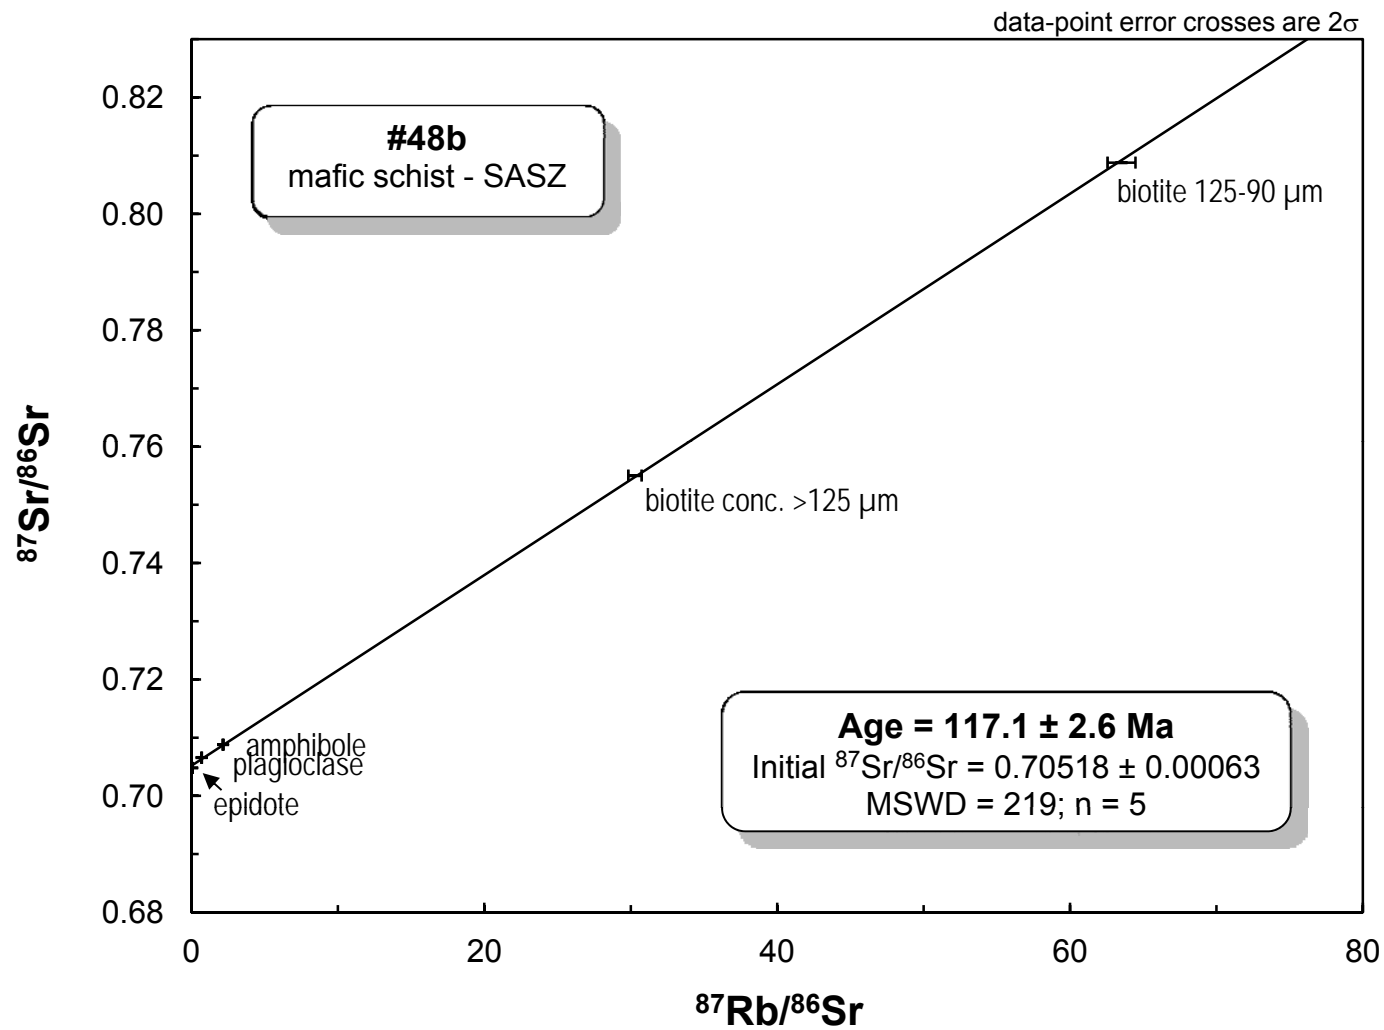

TABLE DR2. Ar-Ar

## #24 (Lazaro unit metasediment)

|                                    | <sup>36</sup> Ar | <sup>37</sup> Ar | <sup>38</sup> Ar | <sup>39</sup> Ar | <sup>40</sup> Ar | Age ± 2σ<br>(Ma) | <sup>40</sup> Ar(r)<br>(%) | K/Ca  | ± 2σ     |
|------------------------------------|------------------|------------------|------------------|------------------|------------------|------------------|----------------------------|-------|----------|
| #1                                 | 0.0873466        | 0.0356136        | 0.0012677        | 15.06000         | 287.1194         | <b>127.80</b>    | ± 0.73                     | 91.71 | ± 8412.4 |
| #2                                 | 0.0999976        | 1.4797592        | 0.0200299        | 9.73323          | 163.8182         | <b>113.29</b>    | ± 0.84                     | 84.68 | ± 3.0    |
| #3                                 | 0.0413473        | 0.0000000        | 0.0046705        | 16.15813         | 312.2876         | <b>129.50</b>    | ± 0.66                     | 96.19 | ± 0.0    |
| #4                                 | 0.0801325        | 1.0284619        | 0.0000000        | 14.34546         | 255.9892         | <b>119.89</b>    | ± 0.66                     | 91.49 | ± 8.0    |
| #5                                 | 0.0754119        | 4.7795608        | 0.0515167        | 8.74795          | 126.4341         | <b>97.70</b>     | ± 0.81                     | 84.97 | ± 0.4    |
| #6                                 | 0.0381377        | 0.2017407        | 0.0511773        | 13.70673         | 200.8439         | <b>99.02</b>     | ± 0.61                     | 94.63 | ± 192.3  |
| #7                                 | 0.0625773        | 0.4707187        | 0.0613541        | 14.50499         | 266.0736         | <b>123.13</b>    | ± 0.64                     | 93.46 | ± 34.0   |
| #8                                 | 0.0396315        | 0.0000000        | 0.0533768        | 10.38763         | 182.4139         | <b>118.04</b>    | ± 0.84                     | 93.92 | ± 0.0    |
| #9                                 | 0.9579532        | 4.5819592        | 0.0132815        | 13.34143         | 247.6784         | <b>124.56</b>    | ± 2.12                     | 46.65 | ± 0.5    |
| #10                                | 0.0190125        | 0.0000000        | 0.0000000        | 14.31742         | 280.7659         | <b>131.33</b>    | ± 0.55                     | 97.99 | ± 0.0    |
| #11                                | 0.0977346        | 0.0000000        | 0.0344353        | 14.61806         | 227.5515         | <b>105.02</b>    | ± 0.51                     | 88.69 | ± 0.0    |
| #12                                | 0.2926610        | 0.0000000        | 0.0000000        | 13.43855         | 259.0958         | <b>129.19</b>    | ± 0.89                     | 74.95 | ± 0.0    |
| #13                                | 0.1271525        | 0.0000000        | 0.0643839        | 4.37491          | 63.8573          | <b>98.65</b>     | ± 1.48                     | 62.93 | ± 0.0    |
| #14                                | 0.0670986        | 0.0000000        | 0.0526429        | 5.72754          | 86.1264          | <b>101.55</b>    | ± 0.86                     | 81.24 | ± 0.0    |
|                                    |                  |                  |                  |                  | <i>Average</i>   | <b>115.62</b>    | <b>± 0.87</b>              |       |          |
|                                    |                  |                  |                  |                  | <i>Std dev.</i>  | <b>12.81</b>     |                            |       |          |
| <b>2 populations of white mica</b> |                  |                  |                  |                  | <i>average 1</i> | <b>124.08</b>    | muscovite                  |       |          |
|                                    |                  |                  |                  |                  | <i>Std dev.</i>  | <b>6.06</b>      |                            |       |          |
|                                    |                  |                  |                  |                  | <i>average 2</i> | <b>100.39</b>    | phengite                   |       |          |
|                                    |                  |                  |                  |                  | <i>Std dev.</i>  | <b>2.95</b>      |                            |       |          |

TABLE DR2. Ar-Ar

## #29a (Lazaro unit basal phyllonite)

|     | <sup>36</sup> Ar | <sup>37</sup> Ar | <sup>38</sup> Ar | <sup>39</sup> Ar | <sup>40</sup> Ar | Age ± 2σ<br>(Ma) |        | <sup>40</sup> Ar(r)<br>(%) | K/Ca  | ± 2σ    |
|-----|------------------|------------------|------------------|------------------|------------------|------------------|--------|----------------------------|-------|---------|
| #1  | 0.0178687        | 1.599615         | 0.0170733        | 2.312508         | 26.60458         | <b>78.20</b>     | ± 2.14 | 83.38                      | 0.622 | ± 1.118 |
| #2  | 0.0280345        | 2.087189         | 0.0000000        | 1.929777         | 22.15203         | <b>78.03</b>     | ± 2.52 | 72.74                      | 0.398 | ± 0.462 |
| #3  | 0.0242715        | 1.937818         | 0.0000000        | 1.395878         | 15.94420         | <b>77.65</b>     | ± 3.15 | 68.93                      | 0.310 | ± 0.366 |
| #4  | 0.0164722        | 1.212813         | 0.0000000        | 1.569039         | 16.84632         | <b>73.08</b>     | ± 2.61 | 77.53                      | 0.556 | ± 0.843 |
| #5  | 0.0281132        | 2.048319         | 0.0284595        | 3.139143         | 32.71550         | <b>70.98</b>     | ± 1.48 | 79.69                      | 0.659 | ± 0.649 |
| #6  | 0.0201950        | 0.996153         | 0.0256693        | 3.136126         | 32.73983         | <b>71.10</b>     | ± 1.45 | 84.52                      | 1.354 | ± 3.763 |
| #7  | 0.0159289        | 4.244555         | 0.0132117        | 5.399020         | 59.72117         | <b>75.25</b>     | ± 0.92 | 92.62                      | 0.547 | ± 0.239 |
| #8  | 0.0334196        | 1.796761         | 0.0212667        | 0.969188         | 12.14753         | <b>85.03</b>     | ± 4.68 | 55.13                      | 0.232 | ± 0.277 |
| #9  | 0.0402772        | 3.590630         | 0.0644562        | 3.776369         | 38.38533         | <b>69.26</b>     | ± 1.22 | 76.28                      | 0.452 | ± 0.259 |
| #10 | 0.0400912        | 1.964154         | 0.0196967        | 3.551521         | 37.52774         | <b>71.95</b>     | ± 1.34 | 75.95                      | 0.778 | ± 0.860 |
| #11 | 0.0193740        | 2.172920         | 0.0643819        | 2.957517         | 29.93288         | <b>68.97</b>     | ± 1.35 | 83.88                      | 0.585 | ± 0.594 |
| #12 | 0.0162087        | 2.662421         | 0.0318260        | 2.507185         | 26.21434         | <b>71.21</b>     | ± 1.79 | 84.49                      | 0.405 | ± 0.386 |
|     |                  |                  |                  |                  | <i>Average</i>   | <b>73.24</b>     | ± 1.82 |                            |       |         |
|     |                  |                  |                  |                  | <i>Std dev.</i>  | <b>3.47</b>      |        |                            |       |         |

TABLE DR2. Ar-Ar

## #39a (micaschist, Garnet amphibolite unit)

|                       | <sup>36</sup> Ar | <sup>37</sup> Ar | <sup>38</sup> Ar | <sup>39</sup> Ar | <sup>40</sup> Ar | Age ± 2σ<br>(Ma) |        | <sup>40</sup> Ar(r)<br>(%) | K/Ca  | ± 2σ    |
|-----------------------|------------------|------------------|------------------|------------------|------------------|------------------|--------|----------------------------|-------|---------|
| #1                    | 0.0187041        | 7.519825         | 0.0340463        | 3.653741         | 53.76238         | 99.42            | ± 1.69 | 90.62                      | 0.209 | ± 0.053 |
| #2                    | 0.0327158        | 1.085463         | 0.0296989        | 1.893989         | 32.53380         | 115.54           | ± 3.94 | 77.06                      | 0.750 | ± 1.072 |
| #3                    | 0.0419768        | 3.345609         | 0.0370542        | 2.250929         | 36.92024         | 110.49           | ± 2.80 | 74.82                      | 0.289 | ± 0.141 |
| #4                    | 0.0526503        | 9.135966         | 0.0420852        | 4.853729         | 73.53957         | 102.29           | ± 1.39 | 82.49                      | 0.228 | ± 0.034 |
| #5                    | 0.0408121        | 5.907393         | 0.0193404        | 3.280736         | 50.90700         | 104.69           | ± 2.15 | 80.81                      | 0.239 | ± 0.068 |
| #6                    | 0.0464245        | 2.888551         | 0.0759786        | 3.994957         | 59.23844         | 100.17           | ± 1.74 | 81.15                      | 0.595 | ± 0.281 |
| #7                    | 0.0397181        | 2.891458         | 0.0500858        | 3.252089         | 50.91986         | 105.61           | ± 2.02 | 81.23                      | 0.484 | ± 0.238 |
| #8                    | 0.0578002        | 2.051999         | 0.0548254        | 2.253539         | 41.49743         | 123.59           | ± 4.05 | 70.82                      | 0.472 | ± 0.568 |
| #9                    | 0.0708177        | 3.226092         | 0.0423047        | 1.799768         | 29.11814         | 109.03           | ± 3.69 | 58.16                      | 0.240 | ± 0.113 |
| #10                   | 0.0777029        | 2.646496         | 0.0811749        | 2.505496         | 41.39514         | 111.27           | ± 2.83 | 64.30                      | 0.407 | ± 0.223 |
| #11                   | 0.0310758        | 3.276818         | 0.0190090        | 4.323943         | 60.63759         | 94.88            | ± 1.38 | 86.80                      | 0.567 | ± 0.315 |
| #12                   | 0.0528357        | 2.340278         | 0.0383986        | 4.397778         | 65.57382         | 100.71           | ± 1.49 | 80.73                      | 0.808 | ± 0.526 |
| #13                   | 0.0887393        | 1.237711         | 0.0670744        | 1.565568         | 27.51280         | 118.13           | ± 5.09 | 51.19                      | 0.544 | ± 1.158 |
| #14                   | 0.0607358        | 1.501590         | 0.0505198        | 2.962345         | 42.64945         | 97.34            | ± 2.36 | 70.35                      | 0.848 | ± 1.284 |
| Average               |                  |                  |                  |                  |                  | 106.65           | ± 2.62 |                            |       |         |
| Std dev.              |                  |                  |                  |                  |                  | 8.40             |        |                            |       |         |
| Average age corrected |                  |                  |                  |                  |                  | 102.69           | 1.99   |                            |       |         |
| Std dev.              |                  |                  |                  |                  |                  | 5.35             |        |                            |       |         |



TABLE DR2. Ar-Ar

## #223J (westernmost exposure of blueschist unit micaschists)

|     | <sup>36</sup> Ar | <sup>37</sup> Ar | <sup>38</sup> Ar | <sup>39</sup> Ar | <sup>40</sup> Ar | Age ± 2σ<br>(Ma) |        | <sup>40</sup> Ar(r)<br>(%) | K/Ca  | ± 2σ     |
|-----|------------------|------------------|------------------|------------------|------------------|------------------|--------|----------------------------|-------|----------|
| #1  | 0.0215075        | 1.574922         | 0.0730032        | 8.87393          | 81.1084          | 62.40            | ± 0.52 | 92.64                      | 2.42  | ± 3.60   |
| #2  | 0.0197058        | 0.000000         | 0.0044423        | 12.67907         | 117.3169         | 63.16            | ± 0.41 | 95.18                      | 0.00  | ± 0.00   |
| #3  | 0.0219912        | 1.783771         | 0.0021983        | 11.00414         | 97.8300          | 60.72            | ± 0.43 | 93.68                      | 2.65  | ± 3.37   |
| #4  | 0.0177940        | 0.962936         | 0.0245452        | 12.48805         | 127.4591         | 69.54            | ± 0.43 | 95.95                      | 5.58  | ± 14.50  |
| #5  | 0.0352716        | 0.362482         | 0.0000000        | 11.23834         | 117.0737         | 70.95            | ± 0.48 | 91.75                      | 13.33 | ± 82.58  |
| #6  | 0.0137325        | 0.334653         | 0.0000000        | 11.87851         | 122.4805         | 70.24            | ± 0.47 | 96.71                      | 15.26 | ± 99.07  |
| #7  | 0.0201583        | 0.000000         | 0.0053757        | 11.66609         | 110.9723         | 64.90            | ± 0.44 | 94.81                      | 0.00  | ± 0.00   |
| #8  | 0.0255382        | 0.000000         | 0.0484298        | 10.82801         | 109.9603         | 69.20            | ± 0.48 | 93.49                      | 0.00  | ± 0.00   |
| #9  | 0.0203947        | 1.158349         | 0.0000000        | 13.57298         | 138.6268         | 69.59            | ± 0.41 | 95.75                      | 5.04  | ± 10.43  |
| #10 | 0.0324134        | 0.438560         | 0.0000000        | 6.86268          | 70.4025          | 69.89            | ± 0.72 | 87.95                      | 6.73  | ± 34.76  |
| #11 | 0.0117157        | 1.708011         | 0.0000000        | 13.28933         | 133.0983         | 68.26            | ± 0.41 | 97.37                      | 3.35  | ± 4.93   |
| #12 | 0.0180306        | 1.180104         | 0.0000000        | 13.46155         | 131.0419         | 66.38            | ± 0.43 | 96.00                      | 4.91  | ± 6.52   |
| #13 | 0.0224635        | 2.924965         | 0.0000000        | 7.83478          | 67.9823          | 59.29            | ± 0.67 | 91.01                      | 1.15  | ± 0.59   |
| #14 | 0.0638670        | 0.220869         | 0.0025568        | 11.04717         | 112.9269         | 69.65            | ± 0.54 | 85.61                      | 21.51 | ± 134.96 |
|     |                  |                  |                  |                  | <i>Average</i>   | <b>66.73</b>     | ± 0.49 |                            |       |          |
|     |                  |                  |                  |                  | <i>Std dev.</i>  | <b>3.92</b>      |        |                            |       |          |

TABLE DR2. Ar-Ar

## #18a (blueschist unit metatuff)

|     | <sup>36</sup> Ar | <sup>37</sup> Ar | <sup>38</sup> Ar | <sup>39</sup> Ar | <sup>40</sup> Ar | Age ± 2σ<br>(Ma) |        | <sup>40</sup> Ar(r)<br>(%) | K/Ca   | ± 2σ      |
|-----|------------------|------------------|------------------|------------------|------------------|------------------|--------|----------------------------|--------|-----------|
| #1  | 0.0148100        | 1.452048         | 0.0434041        | 10.577338        | 119.36386        | 76.73            | ± 0.54 | 96.38                      | 3.132  | ± 3.117   |
| #2  | 0.0073616        | 7.956414         | 0.0446726        | 6.551277         | 76.69534         | 79.54            | ± 0.78 | 97.16                      | 0.354  | ± 0.053   |
| #3  | 0.0119078        | 13.319770        | 0.0203247        | 6.376068         | 73.01742         | 77.85            | ± 0.83 | 95.33                      | 0.206  | ± 0.022   |
| #4  | 0.0182873        | 11.683316        | 0.0000000        | 5.613803         | 68.11390         | 82.37            | ± 1.03 | 92.58                      | 0.207  | ± 0.024   |
| #5  | 0.0198125        | 9.258329         | 0.0160989        | 6.873476         | 78.95218         | 78.08            | ± 0.84 | 93.02                      | 0.319  | ± 0.100   |
| #6  | 0.0170591        | 12.174758        | 0.0123050        | 5.365132         | 63.40768         | 80.28            | ± 1.00 | 92.57                      | 0.189  | ± 0.023   |
| #7  | 0.0432480        | 8.186590         | 0.0128231        | 4.594551         | 56.94599         | 84.11            | ± 1.27 | 81.62                      | 0.241  | ± 0.034   |
| #8  | 0.0167046        | 0.390570         | 0.0000000        | 15.692934        | 177.02689        | 76.71            | ± 0.40 | 97.21                      | 17.277 | ± 101.167 |
| #9  | 0.0346193        | 10.132693        | 0.0276943        | 3.886250         | 45.93047         | 80.29            | ± 1.45 | 81.73                      | 0.165  | ± 0.020   |
| #10 | 0.0168088        | 10.241151        | 0.0087877        | 4.859607         | 57.15077         | 79.90            | ± 1.06 | 91.93                      | 0.204  | ± 0.037   |
|     |                  |                  |                  |                  | <i>Average</i>   | <b>79.59</b>     | ± 0.92 |                            |        |           |
|     |                  |                  |                  |                  | <i>Std dev.</i>  | <b>2.38</b>      |        |                            |        |           |

TABLE DR4. GPS coordinates

| <b>Sampling locality</b> | <b>Latitude (S)</b> | <b>Longitude (W)</b> |
|--------------------------|---------------------|----------------------|
| # 18                     | 51° 36' 12"         | 75° 12' 06"          |
| # 24                     | 51° 32' 24"         | 75° 09' 19"          |
| # 29                     | 51° 35' 13"         | 75° 11' 14"          |
| # 39                     | 51° 34' 26"         | 75° 12' 35"          |
| # 43                     | 51° 37' 22"         | 75° 12' 23"          |
| # 47                     | 51° 34' 52"         | 75° 11' 59"          |
| # 48                     | 51° 27' 33"         | 75° 08' 43"          |
| #223                     | 51° 38' 04"         | 75° 18' 19"          |

**GPS Coordinates of studied sampling localities**
